# Supplementary material for: Genetic signatures of Mycobacterium tuberculosis Nonthaburi genotype revealed by whole genome analysis of isolates from tuberculous meningitis patients in Thailand
Source: PubMed Central journal article supplement (PMC4841212; doi:10.7717/peerj.1905), 2016-04-12

**Figure S2**

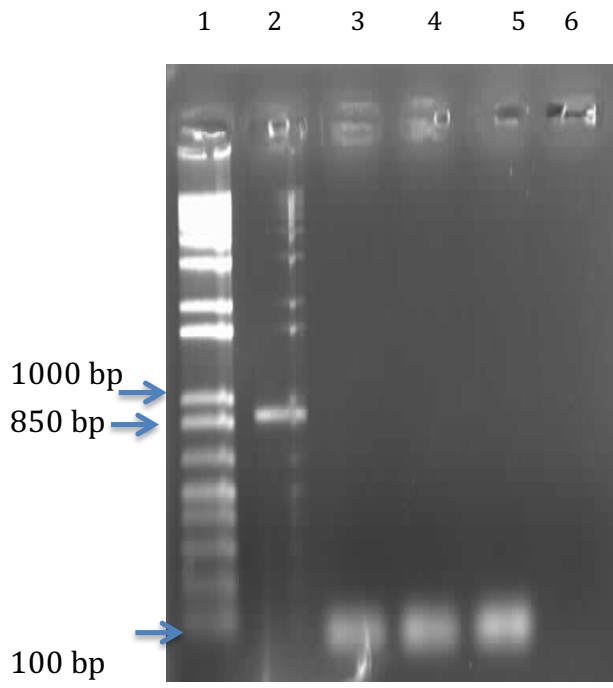

**Figure S3**

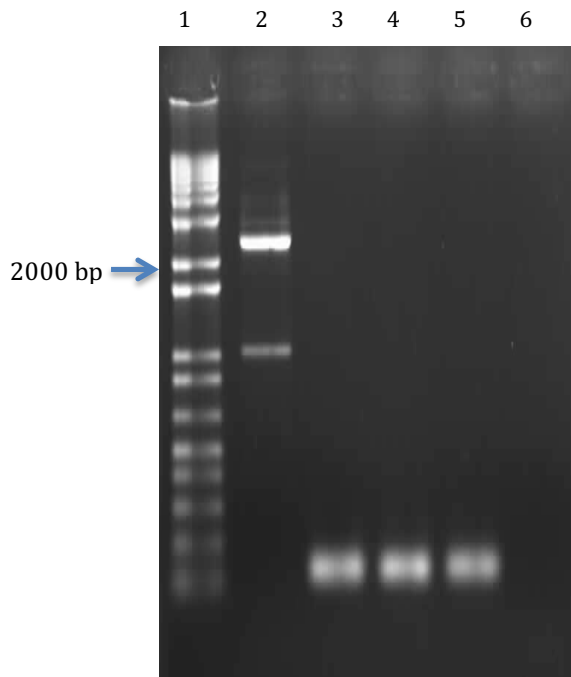

**Figure S4**

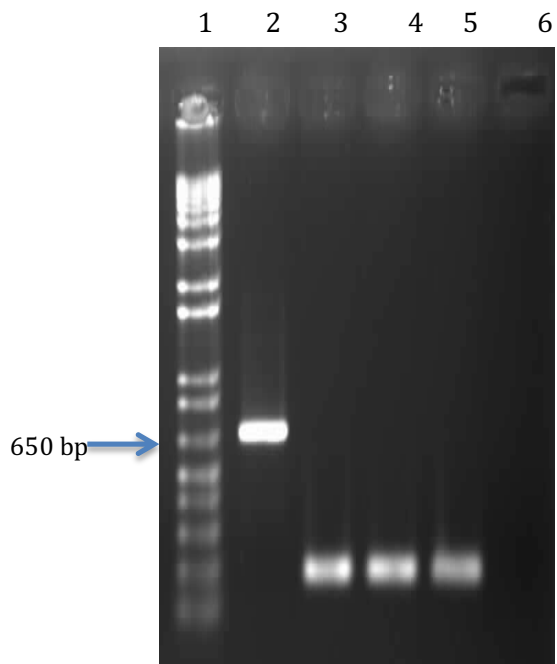

Supplement: peerj-04-1905-s002.pdf [file peerj-04-1905-s002.pdf]
