# Supplementary material for: Genetic signatures of Mycobacterium tuberculosis Nonthaburi genotype revealed by whole genome analysis of isolates from tuberculous meningitis patients in Thailand
Source: PeerJ. 2016 Apr 12;4:e1905. doi: 10.7717/peerj.1905 (PMC4841212; doi:10.7717/peerj.1905)
Supplement: Table S4 — The reference genome positions, nucleotide change, amino acid change and effect of single nucleotide polymorphisms in essential genes that are common to isolates CSF3053, 46-5069 and 43-13838. The protein variation was determined by Protein Variation Effect Analyzer (PROVEAN). A web based protein variation analysis tool (Choi et al., 2012). [file peerj-04-1905-s005.xlsx]

## Sheet: snpsinessentialgenes.txt
Position	Nucleotide change	Amino acid change	Gene	Effect	Protein variation effect
1302	C>A	Pro434Pro	dnaA	synonymous
6112	G>C	Met291Ile	gyrB	non-synonymous	Deleterious
16526	C>T	Gln315Gln	pknB	synonymous
43945	A>G	Val128Val	leuS	synonymous
62049	A>G	Arg552Gly	dnaB	non-synonymous	Neutral
64028	C>T	Pro40Pro	Rv0060	synonymous
115499	T>G	Arg1833Arg	nrp	synonymous
116000	T>G	Val2000Val	nrp	synonymous
137233	C>T	Ala315Ala	gca	synonymous
143207	T>C	Ser224Gly	oxcA	non-synonymous	Neutral
199470	T>G	Ser313Ala	mce1A	non-synonymous	Neutral
200379	C>T	Ala162Val	mce1B	non-synonymous	Deleterious
208322	T>G	Ser291Ala	Rv0176	non-synonymous	Neutral
243598	A>G	His72Arg	Rv0205	non-synonymous	Neutral
261869	T>C	Cys316Arg	Rv0218	non-synonymous	Neutral
272678	C>T	Ala54Ala	Rv0227c	synonymous
273568	G>T	Ala172Ser|	Rv0228	non-synonymous	Neutral
283614	T>C	Ser1080Gly	Rv0236c	non-synonymous	Neutral
285772	A>C	Pro360Pro	Rv0236c	synonymous
285871	A>G	Val327Val	Rv0236c	synonymous
342146	A>C	Glu6Ala	Rv0282	non-synonymous	Neutral
343281	G>C	Ala384Ala	Rv0282	synonymous
344288	C>G	Ser89Ser	Rv0283	synonymous
346275	C>G	Pro214Arg	Rv0284	non-synonymous	Neutral
356528	A>G	Asn217Asp	Rv0292	non-synonymous	Neutral
381030	A>G	Ser159Gly	Rv0312	non-synonymous	Neutral
403980	G>A	Ala621Val	Rv0338c	non-synonymous	Neutral
404326	T>C	Arg506Gly	Rv0338c	non-synonymous	Neutral
420008	A>G	Ala58Ala	dnaK	synonymous
420405	C>T	Arg191Cys	dnaK	non-synonymous	Deleterious
485230	C>T	His418His	fadD30	synonymous
495198	A>G	Phe706Ser	pknG	non-synonymous	Deleterious
495473	C>T	Ser614Ser	pknG	synonymous
498531	A>G	Ala363Ala	Rv0412c	synonymous
498557	C>A	Asp355Tyr	Rv0412c	non-synonymous	Neutral
502589	C>G	Ser75Cys	thiG	non-synonymous	Neutral
508435	C>T	Val41Ile	thiD	non-synonymous	Neutral
513257	T>C	Met689Val	ctpH	non-synonymous	Neutral
514657	T>G	Glu222Ala	ctpH	non-synonymous	Neutral
541201	A>G	Leu97Leu	mmpl4	synonymous
568693	G>T	Ala92Glu	Rv0479c	non-synonymous	Neutral
580008	A>G	Leu220Leu	senX3	synonymous
580336	C>A	Arg330Arg	senX3	synonymous
590436	T>C	Ala118Ala	proC	synonymous
590763	G>C	Glu227Asp	proC	non-synonymous	Neutral
615938	G>A	Glu368Glu	hemL	synonymous
646531	A>T	Thr78Thr	menD	synonymous
648002	T>G	Leu15Arg	Rv0556	non-synonymous	Neutral
648856	T>C	Gly107Gly	pimB	synonymous
649345	C>T	Ala270Ala	pimB	synonymous
657578	A>G	Asp154Asp	Rv0566c	synonymous
685955	G>A	Ala10Thr	yrbE2B	non-synonymous	Neutral
686066	A>G	Ile47Val	yrbE2B	non-synonymous	Neutral
718984	C>T	Ala310Val	Rv0628c	non-synonymous	Neutral
734116	T>C	Met127Thr	secE	non-synonymous
752046	C>T	Ala177Val	mkl	non-synonymous	Deleterious
763531	G>C	Pro54Pro	rpoC	synonymous
763884	C>T	Ala172Val	rpoC	non-synonymous	Neutral
763886	C>A	Arg173Arg	rpoC	synonymous
797597	C>T	Thr222Met	Rv0697	non-synonymous	Deleterious
811492	C>G	Val40Val	rplN	synonymous
812502	C>T	Val148Val	rplE	synonymous
865761	C>T	His392His	purD	synonymous
903550	T>C	Ala480Ala	purF	synonymous
1055126	C>T	Leu520Leu	pgi	synonymous
1061386	T>C	Glu90Gly	Rv0950c	non-synonymous	Neutral
1063765	G>A	Arg209Lys	sucD	non-synonymous	Neutral
1063922	C>T	Gly261Gly	sucD	synonymous
1068432	A>G	Pro76Pro	purH	synonymous
1083755	T>C	Ser666Pro	accA2	non-synonymous	Neutral
1085623	T>C	Val43Ala	accA2	non-synonymous	Deleterious
1098523	T>A	Leu339His	mprB	non-synonymous	Neutral
1109975	A>G	Gln235Arg	galU	non-synonymous	Neutral
1119739	G>A	Leu67Leu	Rv1002c	synonymous
1123597	A>G	Start lost	pabB	non-synonymous
1136017	A>G	Gly155Gly	prs	synonymous
1144585	A>G	Arg8Gly	eno	non-synonymous	Neutral
1149551	C>T	Glu712Glu	kdpD	synonymous
1150585	G>A	Pro368Ser	kdpD	non-synonymous	Neutral
1228116	A>G	Ile156Thr	glpX	non-synonymous
1237403	G>A	Pro264Ser	Rv1111c	non-synonymous	Deleterious
1252164	T>C	Glu270Gly	Rv1128c	non-synonymous	Neutral
1259841	C>T	Glu502Glu	metE	synonymous
1297397	G>A	Gly416Ser	lpqW	non-synonymous	Neutral
1320508	G>A	Val158Val	papA3	synonymous
1320614	C>G	Leu194Val	papA3	non-synonymous	Deleterious
1327890	G>A	Asp472Asp	Rv1186c	synonymous
1328687	G>C	Pro207Ala	Rv1186c	non-synonymous	Neutral
1344857	C>T	Gly105Ser	Rv1201c	non-synonymous	Neutral
1358940	C>A	Ala169Ser	Rv1215c	non-synonymous	Neutral
1367484	T>G	Trp8Gly	tatB	non-synonymous	Neutral
1375724	A>C	Cys149Gly	Rv1232c	non-synonymous	Neutral
1387211	G>A	Ala119Thr	lpqZ	non-synonymous	Neutral
1424699	T>C	Leu168Pro	lprB	non-synonymous	Neutral
1440469	C>G	Pro521Pro	cysNC	synonymous
1451009	G>A	Ala105Thr	thrC	non-synonymous	Neutral
1453996	C>G	Arg265Gly	rho	non-synonymous	Deleterious
1458144	C>A	Pro196Gln	Rv1301	non-synonymous	Neutral
1460907	T>C	Phe222Leu	atpB	non-synonymous	Deleterious
1490905	A>G	Ser470Pro	glgB	non-synonymous	Neutral
1490911	G>A	Pro468Ser	glgB	non-synonymous	Neutral
1492194	T>C	Asp40Gly	glgB	non-synonymous	Neutral
1502226	C>T	Pro210Ser	Rv1333	non-synonymous	Neutral
1505194	T>C	Gly40Gly	murl	synonymous
1505973	G>A	Arg19Arg	Rv1339	synonymous
1514010	G>T	Val322Phe	Rv1348	non-synonymous	Neutral
1544255	C>T	Arg299Arg	Rv1371	synonymous
1553855	C>T	Thr208Thr	pyrB	synonymous
1563717	C>T	Val8Val	mihF	synonymous
1567985	A>G	Glu387Glu	metK	synonymous
1581377	C>T	Gly198Asp	Rv1405c	non-synonymous	Deleterious
1585283	A>C	Lys30Asn	ribG	non-synonymous	Neutral
1585404	G>A	Ala71Thr	ribG	non-synonymous	Neutral
1590555	C>T	Thr53Thr	ribBA	synonymous
1613927	C>A	Ala207Ala	gap	synonymous
1624791	C>G	Arg192Pro	opcA	non-synonymous	Neutral
1625259	A>C	Ile36Ser	opcA	non-synonymous	Deleterious
1627351	T>C	Thr244Ala	tal	non-synonymous	Neutral
1630148	A>C	Tyr18Asp	tkt	non-synonymous	Neutral
1645802	T>C	Lys113Glu	Rv1459c	non-synonymous	Neutral
1650072	A>G	Asn183Asp	Rv1462	non-synonymous	Neutral
1657843	G>A	Arg294His	ctpD	non-synonymous	Deleterious
1658535	G>T	Val525Phe	ctpD	non-synonymous	Deleterious
1679833	C>A	Thr171Asn	Rv1490	non-synonymous	Deleterious
1706119	T>C	Ser159Ser	Rv1514c	synonymous
1803265	G>A	Ser201Asn	hisH	non-synonymous	Neutral
1832293	G>C	Glu543Asp	polA	non-synonymous	Neutral
1832642	G>T	Gly660Cys	polA	non-synonymous	Deleterious
1832643	G>C	Gly660Ala	polA	non-synonymous	Deleterious
1859559	C>A	Ala276Asp	pheS	synonymous
1859989	C>T	Arg78Trp	pheT	non-synonymous	Neutral
1872959	A>G	Arg107Arg	argH	synonymous
1873954	G>T	Arg439Leu	argH	non-synonymous	Deleterious
1875886	C>A	Leu195Met	pks7	non-synonymous	Neutral
1876739	T>G	Val479Gly	pks7	non-synonymous	Deleterious
1885772	G>A	Ala1357Thr	pks8	non-synonymous	Neutral
1886263	C>G	His1520Gln	pks8	non-synonymous	Neutral
1886859	C>A	Gly116Gly	pks17	synonymous
1887284	G>A	Arg258Gln	pks17	non-synonymous	Deleterious
1920120	G>T	Pro146Pro	recN	synonymous
1923985	G>A	Val53Ile	pyrG	non-synonymous	Neutral
1924959	T>C	Gly377Gly	pyrG	synonymous
1936525	G>A	Ala56Thr	Rv1708	non-synonymous	Neutral
1939044	G>T	Val69Val	Rv1711	synonymous
1940307	G>T	Trp7Leu	engA	non-synonymous	Neutral
1956930	T>G	Thr106Pro	Rv1730c	non-synonymous	Deleterious
2066471	T>C	Gly5Gly	secA2	synonymous
2218012	A>G	Ala118Ala	Rv1974	synonymous
2287121	A>G	Asp242Asp	Rv2041c	synonymous
2295692	C>T	Val3765Val	pks12	synonymous
2296042	G>C	Pro3649Ala	pks12	non-synonymous	Neutral
2297766	G>A	Ala3074Val	pks12	non-synonymous	Deleterious
2300237	A>G	Ala2250Ala	pks12	synonymous
2300546	A>T	His2147Gln	pks12	non-synonymous	Neutral
2300552	T>G	Pro2145Pro	pks12	synonymous
2300555	A>G	Asp2144Asp	pks12	synonymous
2301089	T>C	Leu1966Leu	pks12	synonymous
2329533	A>G	Leu205Pro	cobL	non-synonymous	Neutral
2369186	G>C	Arg182Gly	prcA	non-synonymous	Neutral
2369326	C>G	Arg135Pro	prcA	non-synonymous	Neutral
2397445	C>T	Pro39Leu	lppL	non-synonymous	Neutral
2397760	C>G	Ala144Gly	lppL	non-synonymous	Neutral
2413246	C>A	Val36Leu	murG	non-synonymous	Neutral
2415656	G>C	Arg247Gly	murD	non-synonymous	Neutral
2425097	A>C	Val664Gly	pbpB	non-synonymous	Deleterious
2425471	T>C	Arg539Arg	pbpB	synonymous
2428081	G>A	Ala53Val	Rv2164c	non-synonymous	Neutral
2436838	G>A	Arg310Arg	Rv2174	synonymous
2437259	G>T	Ala451Ser	Rv2174	non-synonymous	Neutral
2440926	G>T	Asp265Glu	aroG	non-synonymous	Neutral
2450045	G>A	Thr369Met	Rv2188c	non-synonymous	Neutral
2451081	C>G	Glu24Gln	Rv2188c	synonymous
2486342	C>T	Phe36Phe	Rv2219	synonymous
2495500	T>C	Leu508Leu	Rv2224c	synonymous
2508395	G>A	Pro253Pro	Rv2235	synonymous
2518132	C>T	Thr6Thr	kasA	synonymous
2519048	G>A	Gly312Ser	kasA	non-synonymous	Neutral
2521342	T>C	Asp200Asp	accD6	synonymous
2526974	T>C	Pro470Pro	Rv2251	synonymous
2547274	A>G	Asp131Gly	Rv2275	non-synonymous	Neutral
2639868	A>G	Asp399Asp	glyQS	synonymous
2641840	A>G	His64Arg	furB	non-synonymous	Neutral
2652908	C>G	Glu360Asp	dnaJ2	non-synonymous	Neutral
2654696	G>A	Ser133Leu	hrcA	non-synonymous	Deleterious
2679840	G>C	Leu56Val	mbtl	non-synonymous
2695378	C>G	Gly141Ala	cysW	non-synonymous	Neutral
2696977	G>C	Ala246Ala	subl	synonymous
2737201	A>C	Ser349Ser	proB	synonymous
2737572	C>A	Ala226Ser	proB	non-synonymous	Neutral
2790458	A>C	Cys189Gly	plsC	non-synonymous	Neutral
2817158	C>A	Met439Ile	accD1	non-synonymous	Deleterious
2840849	G>C	Gly2828Gly	fas	synonymous
2841022	A>G	Cys2771Arg	fas	non-synonymous	Neutral
2842043	C>G	Trp2430Cys	fas	non-synonymous	Deleterious
2844546	C>A	Gly1596Val	fas	non-synonymous	Deleterious
2847281	A>G	Asp684Asp	fas	synonymous
2858669	G>T	Ala19Asp	nusB	non-synonymous	Neutral
2939373	G>C	Ser197Cys	Rv2611c	non-synonymous	Neutral
2939657	T>C	Ile102Met	Rv2611c	non-synonymous	Neutral
2940608	C>T	Ser2Asn	pgsA1	non-synonymous	Neutral
3015379	G>A	Pro59Pro	Rv2700	synonymous
3017465	T>C	Ile203Thr	ppgk	non-synonymous	Neutral
3040582	A>G	His63Arg	miaA	non-synonymous	Deleterious
3118449	A>G	Ile76Val	Rv2813	non-synonymous	Neutral
3135852	C>A	Ala161Glu	Rv2828c	non-synonymous	Neutral
3135859	T>C	Leu159Leu	Rv2828c	synonymous
3135861	G>T	Thr158Lys	Rv2828c	non-synonymous	Neutral
3135862	A>C	Thr158Pro	Rv2828c	non-synonymous	Neutral
3135871	G>C	Val155Leu	Rv2828c	non-synonymous	Neutral
3135950	G>C	Ser128Ser	Rv2828c	synonymous
3135951	G>C	Ser128Trp	Rv2828c	non-synonymous	Neutral
3135961	C>T	Leu125Leu	Rv2828c	synonymous
3135962	G>C	Val124Val	Rv2828c	synonymous
3137058	C>T	Ala56Val	Rv2830c	non-synonymous	Neutral
3138129	C>G	Phe351Leu	ugpC	non-synonymous	Deleterious
3148984	G>A	Ala149Thr	nusA	non-synonymous	Neutral
3154414	T>C	Ile73Thr	efpA	non-synonymous	Neutral
3180988	G>T	Val259Phe	Rv2869c	non-synonymous	Neutral
3226181	T>G	Arg35Arg	ffh	synonymous
3233605	C>T	Leu179Leu	ftsY	synonymous
3241244	C>T	Thr239Ile	Rv2927c	non-synonymous	Neutral
3273138	C>G	His309Asp	drrA	non-synonymous	Neutral
3274545	G>A	Leu158Leu	drrC	synonymous
3285318	C>T	Ala83Ala	mmpL7	synonymous
3326150	A>G	Asp17Gly	Rv2971	non-synonymous	Deleterious
3326554	A>C	Asn152His	Rv2971	non-synonymous	Neutral
3336825	A>G	Thr365Ala	ddl	non-synonymous	Neutral
3352932	G>T	Thr179Thr	leuB	synonymous
3352933	C>T	Thr179Met	leuB	non-synonymous	Deleterious
3358235	A>T	Met212Leu	lppY	synonymous
3367765	C>T	Gly343Gly	gatB	synonymous
3371260	T>C	Ile59Val	gatA	non-synonymous	Neutral
3402816	C>T	Gly116Glu	serB2	non-synonymous	Neutral
3409007	G>A	Asp124Asp	nrdF2	synonymous
3424462	C>T	Leu322Leu	fadE22	synonymous
3453382	C>T	Ala153Val	RV3087	non-synonymous	Neutral
3454263	C>G	Leu447Val	RV3087	non-synonymous	Neutral
3479545	C>A	Ala125Ala	moaC1	synonymous
3479561	G>A	Asp131Asn	moaC1	synonymous
3480386	G>A	Ala105Thr	Rv3113	non-synonymous	Neutral
3480474	G>A	Gly134Glu	Rv3113	non-synonymous	Neutral
3480789	T>C	Ser11Pro	Rv3114	non-synonymous	Neutral
3497586	G>C	Ala560Ala	devS	synonymous
3498418	T>C	Ile283Thr	devS	non-synonymous	Neutral
3503895	C>T	Pro168Leu	Rv3137	non-synonymous	Neutral
3619854	T>C	Gly226Gly	secA1	synonymous
3622441	T>G	Val217Val	Rv3243c	synonymous
3625065	A>C	Met517Leu	mtrB	non-synonymous	Neutral
3629612	C>T	Thr12Thr	ahcY	synonymous
3638093	C>T	Ser206Leu	pmmA	non-synonymous	Neutral
3658266	G>C		purE	synonymous
3721806	C>G	Gly265Gly	Rv3335c	synonymous
3770325	C>T	Ala109Thr	folD	non-synonymous	Neutral
3785946	A>G	Arg339Gly	Rv3371	non-synonymous	Neutral
3786033	A>G	Ile368Val	Rv3371	non-synonymous	Neutral
3815477	G>T	Ala210Ala	Rv3398c	synonymous
3830566	G>A	Ser318Ser	guaB	synonymous
3830695	A>G	Ala275Ala	guaB	synonymous
3862181	C>T	Gln70Gln	rplM	synonymous
3909235	G>C	Val334Leu	otsA	non-synonymous	Neutral
3913737	G>A	Ala266Ala	lprN	synonymous
3920109	G>T	Ile251Ile	yrbE4A	synonymous
3921094	C>T	Arg316His	Rv3502c	non-synonymous	Neutral
3984321	G>A	His375His	cyp125	synonymous
3984926	G>A	Leu174Leu	cyp125	synonymous
3989914	G>T	Ala7Ser	Rv3551	non-synonymous	Neutral
4005114	G>C	Trp275Ser	fadE32	non-synonymous	Neutral
4005607	T>C	Leu121Leu	fadE33	synonymous
4022652	G>A	Ser384Ser	cysS1	synonymous
4024079	T>C	Gln90Arg	ispF	non-synonymous	Neutral
4024273	T>C	Val25Val	ispF	synonymous
4024368	C>T	Leu224Leu	ispD	synonymous
4034827	C>T	Ala159Val	lpqF	non-synonymous	Neutral
4040517	A>G	Val63Ala	clpC	non-synonymous	Deleterious
4049254	G>A	Leu243Leu	folP1	synonymous
4054637	A>G	Gly20Gly	Rv3614c	synonymous
4055801	G>A	Thr192Ile	Rv3616c	non-synonymous	Neutral
4067152	G>A	Ala45Val	Rv3627c	non-synonymous	Neutral
4085200	G>C	Asp686Glu	topA	non-synonymous	Neutral
4089058	T>C	Leu93Pro	Rv3649	synonymous
4092086	C>T	Gly82Gly	Rv3651	synonymous
4092087	G>T	Val83Leu	Rv3651	non-synonymous	Neutral
4096190	G>A	Ala250Ala	Rv3658c	synonymous
4105757	C>T	Arg443Gln	dppA	non-synonymous	Neutral
4106154	C>T	Glu311Lys	dppA	non-synonymous	Deleterious
4107074	T>C	Gln4Arg	dppA	non-synonymous	Neutral
4111303	G>C	Val159Val	Rv3669	synonymous
4119246	T>C	Asp157Asp	Rv3679	synonymous
4151855	A>G	Pro121Pro	asd	synonymous
4155266	C>G	Gly509Gly	leuA	synonymous
4158361	A>G	Pro45Pro	cobQ2	synonymous
4236844	G>A	Ala356Thr	Rv3790	non-synonymous	Neutral
4237383	C>A	Thr73Thr	Rv3791	synonymous
4240671	C>T	Thr270Ile	embC	non-synonymous	Neutral
4241042	A>G	Asn394Asp	embC	non-synonymous	Deleterious
4242643	C>T	Arg927Arg	embC	synonymous
4243580	G>A	Val116Val	embA	synonymous
4244420	G>C	Val396Val	embA	synonymous
4245969	C>T	Pro913Ser	embA	non-synonymous	Deleterious
4247578	G>A	Leu355Leu	embB	synonymous
4247646	A>C	Glu378Ala	embB	non-synonymous	Neutral
4255679	C>T	Pro90Pro	accD4	synonymous
4255922	A>G	His9His	accD4	synonymous
4257220	A>G	Arg1309Arg	pks13	synonymous
4258855	C>G	Ala764Ala	pks13	synonymous
4259217	A>T	Leu644Met	pks13	non-synonymous	Neutral
4261499	G>A	Ala523Val	fadD32	non-synonymous
4269387	T>G	Glu149Asp	Rv3806c	non-synonymous	Neutral
4269606	A>G	Arg76Arg	Rv3806c	synonymous
4334425	G>C	Gln553Glu	gltB	non-synonymous	Neutral
4344058	T>C	Ser249Pro	Rv3868	non-synonymous	Deleterious
4345682	C>T	Ser215Leu	Rv3869	non-synonymous	Neutral
4348418	G>A	Leu646Leu	Rv3870	synonymous
4363243	A>C	Trp60Gly	Rv3882c	non-synonymous	Deleterious
4398732	G>A	Leu712Leu	Rv3910	synonymous
4399137	G>A	Leu847Leu	Rv3910	synonymous
